# Supplementary material
Source: Elsevier journal article supplement (https://www.sciencedirect.com/science/article/pii/S2605153219300330)
Supplement: mmc1 [file S2605153219300330:mmc1.pdf]

## QRS-L: una puntuación electrocardiográfica para el cribado rápido de la disfunción sistólica ventricular izquierda

### MATERIAL ADICIONAL

#### Método de medida de los diferentes parámetros electrocardiográficos

Según la situación concreta, los electrocardiogramas se obtenían digitalmente en formato PDF en algunos electrocardiógrafos, o en papel en otros modelos más antiguos, precisando de digitalización en PDF a 300 ppp.

Posteriormente, y mediante un visor PDF, sin excesiva ampliación (para remedar la medición que puede hacerse en una consulta), y utilizando el propio milimetrado del papel (de cara a simular las condiciones descritas de consulta), se realizaban mediciones directas de amplitud, duración, profundidad, componente positivo y componente negativo de onda P, supra e infradesnivelación del segmento ST, duración y profundidad de onda Q, duración, amplitud y presencia o no de melladuras en onda R, duración, profundidad y presencia o no de melladuras en onda S, presencia de T negativa, relación entre R y S y duración total de QRS. Además, se establecía tipo de ritmo y la presencia de alteraciones de la conducción intraventricular.

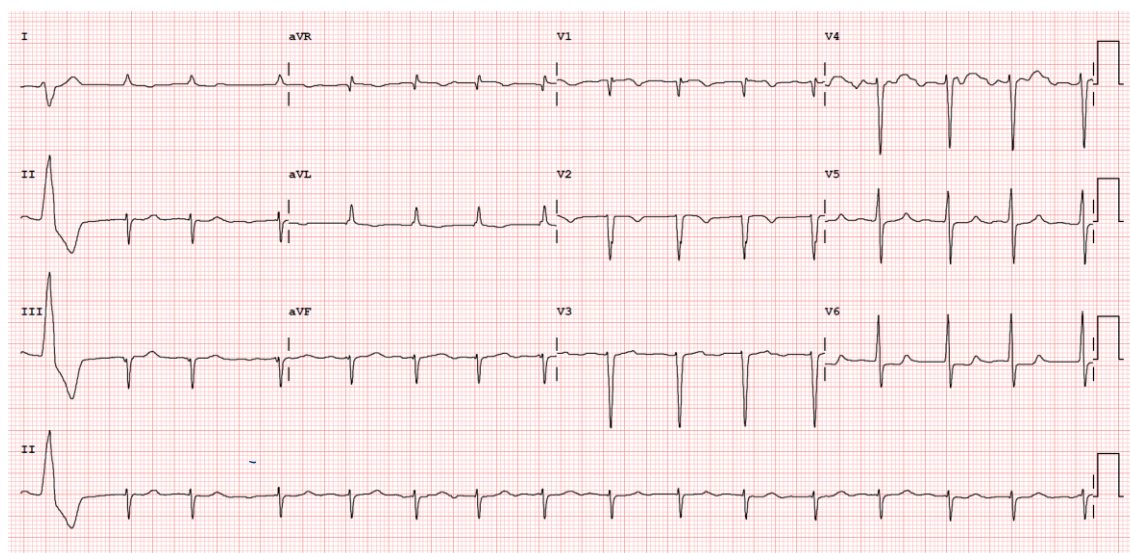

#### Ejemplo 1

En el ejemplo 1, el electrocardiograma (el primer latido se obvia, por ser una extrasístole ventricular) presenta 3 ondas Q patológicas (en DIII, V<sub>1</sub> y V<sub>2</sub>, 1 punto), duración de onda R en V<sub>6</sub> de 1 mm

(< 1,5 mm, 0 puntos), se observa una melladura en onda S en V<sub>2</sub> (1 punto), y no cumple criterios para bloqueo de rama izquierda (0 puntos). En total, el electrocardiograma puntuaría como 2 puntos, con lo que no se podría descartar la presencia de disfunción ventricular.

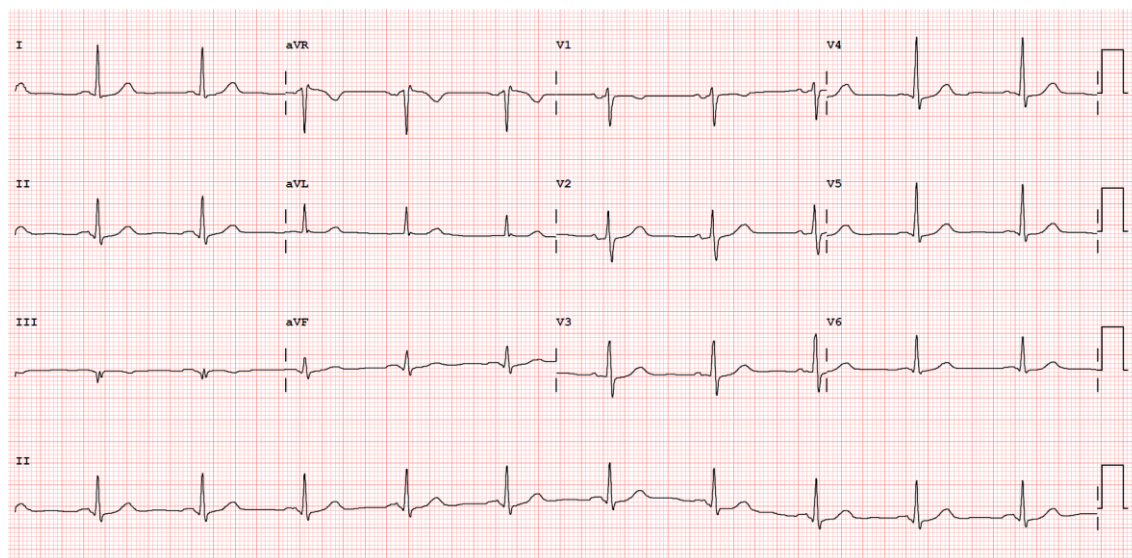

### Ejemplo 2

En el ejemplo 2 se presenta un electrocardiograma con una única onda Q patológica en DIII (0 puntos), con duración de R en V<sub>6</sub> de 1,25 mm (< 1,5 mm, 0 puntos), sin melladuras en onda S evidentes (0 puntos) y sin BRI, con lo que la puntuación total del QRS-L sería de 0 y se descartaría la presencia de disfunción ventricular izquierda sistólica.
